# Supplementary material for: Long-range RNA structures in the human transcriptome beyond evolutionarily conserved regions
Source: PeerJ journal article supplement (doi:10.7717/peerj.16414), 2023-11-28
Supplement: supp_v4.pdf [file supp_v4.pdf]

# SUPPLEMENTARY INFORMATION: Long-range RNA structures in the human transcriptome beyond evolutionarily conserved regions

Sergei Margasyuk<sup>1</sup>, Lev Zavileisky<sup>1</sup>, Changchang Cao<sup>2</sup>, and Dmitri  
D. Pervouchine<sup>1,\*</sup>

<sup>1</sup>Skolkovo Institute of Science and Technology, Moscow 121205,  
Russia

<sup>2</sup>Key Laboratory of RNA Biology, Institute of Biophysics, Chinese  
Academy of Sciences, Beijing 100101, China

\*d.pervouchine@skoltech.ru

September 28, 2023

## List of Figures

|    |                                                                                              |   |
|----|----------------------------------------------------------------------------------------------|---|
| S1 | A schematic representation of the procedure to identify PNCC (see Methods). . . . .          | 3 |
| S2 | The number of split reads supporting RNA contacts from all RIC-seq experiments. . . . .      | 3 |
| S3 | The distance between complementary sequences in intronic, exonic, and mixed regions. . . . . | 4 |

## List of Tables

|    |                                             |   |
|----|---------------------------------------------|---|
| S1 | Control RNA-seq accession numbers . . . . . | 3 |
|----|---------------------------------------------|---|

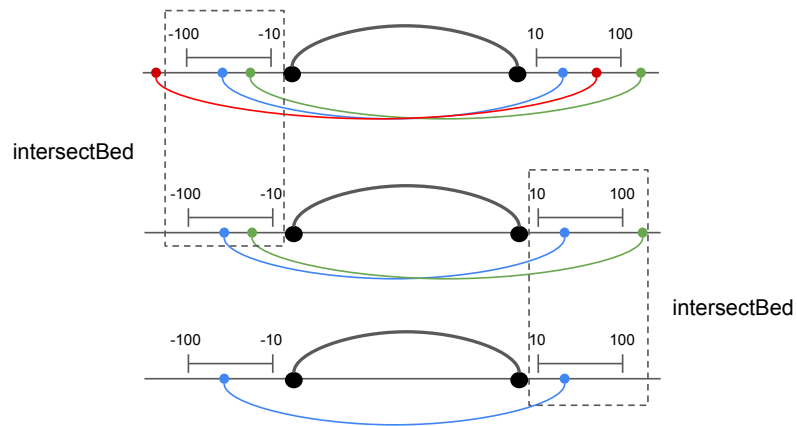

**Figure S1:** A schematic representation of the procedure to identify PNCC (see Methods).

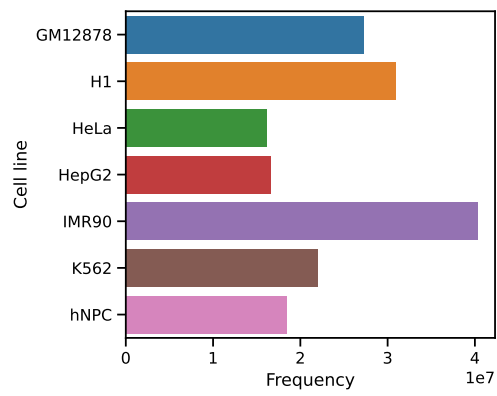

**Figure S2:** The number of split reads supporting RNA contacts from all RIC-seq experiments.

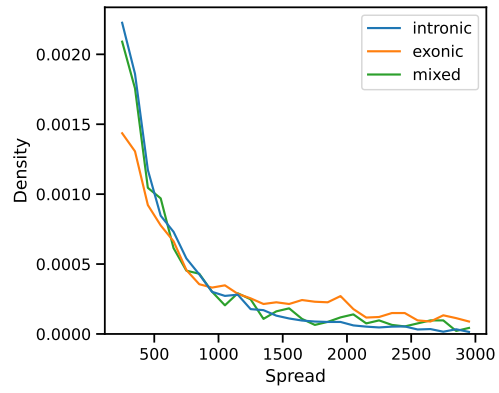

**Figure S3:** The distance between complementary sequences in intronic, exonic, and mixed regions.

|         |             |
|---------|-------------|
| HeLa    | ENCSR000CPR |
| HepG2   | ENCSR000CPE |
| GM12878 | ENCSR000AED |
| H1      | ENCSR000COU |
| IMR90   | ENCSR000CTQ |
| hNPC    | ENCSR244ISQ |
| neuron  | ENCSR292TAP |
| K562    | ENCSR000CPH |

**Table S1:** Accession numbers of RNA-seq experiments used as a matched set control.
